# Supplementary material
Source: publisher figshare collection journal article supplement (https://karger.figshare.com/ndownloader/files/33004694)
Supplement: Supplementary file 1 [file 33004694]

**Supp. Table 2.** Proportion of repetitive DNA elements in the bambara groundnut genome obtained using the RepeatExplorer program

| **Superfamily** | **Family** | **Subfamily** |  | **Proportion (%)** |
| --- | --- | --- | --- | --- |
| Satellite |  |  |  | 1 |
| rDNA |  |  |  | 0,90 |
| Mobile Element |  |  |  | 24,8 |
|  | Class I |  |  | 22,6 |
|  |  | LTR |  | 22,6 |
|  |  |  | Ty1_copia | 9,00 |
|  |  |  | Ty3_gypsy | 13,6 |
|  | Class II |  |  | 2,20 |
|  |  | Subclass_1 |  | 2,20 |
|  |  |  | TIR | 2,20 |
